# Supplementary material for: Mobile Genetic Elements Drive the Antibiotic Resistome Alteration in Freshwater Shrimp Aquaculture
Source: MDPI journal article supplement (doi:10.3390/w13111461), 2021-05-23
Supplement: s1 [file s1]

Supplementary data for

# Mobile Genetic Elements Drive the Antibiotic Resistome Alteration in Freshwater Shrimp Aquaculture

Hao Fang<sup>1</sup>, Nan Ye<sup>1</sup>, Kailong Huang<sup>1,2,3,\*</sup>, Junnan Yu<sup>1</sup> and Shuai Zhang<sup>1</sup>

- <sup>1</sup> Collaborative Innovation Center of Atmospheric Environment and Equipment Technology, Jiangsu Key Laboratory of Atmospheric Environment Monitoring and Pollution Control, School of Environmental Science and Engineering, Nanjing University of Information Science & Technology, Nanjing 210044, China; fh@nuist.edu.cn (H.F.); nan.ye@nuist.edu.cn (N.Y.); yjn879246405@163.com (J.Y.); zhangshuai198702@163.com (S.Z.)
- <sup>2</sup> State Key Laboratory of Pollution Control and Resource Reuse, School of the Environment, Nanjing University, Nanjing 210023, China
- <sup>3</sup> Nanjing Jiangdao Institute of Environmental Research Co., Ltd., Nanjing 210019, China
- \* Correspondence: huangkl@nju.edu.cn

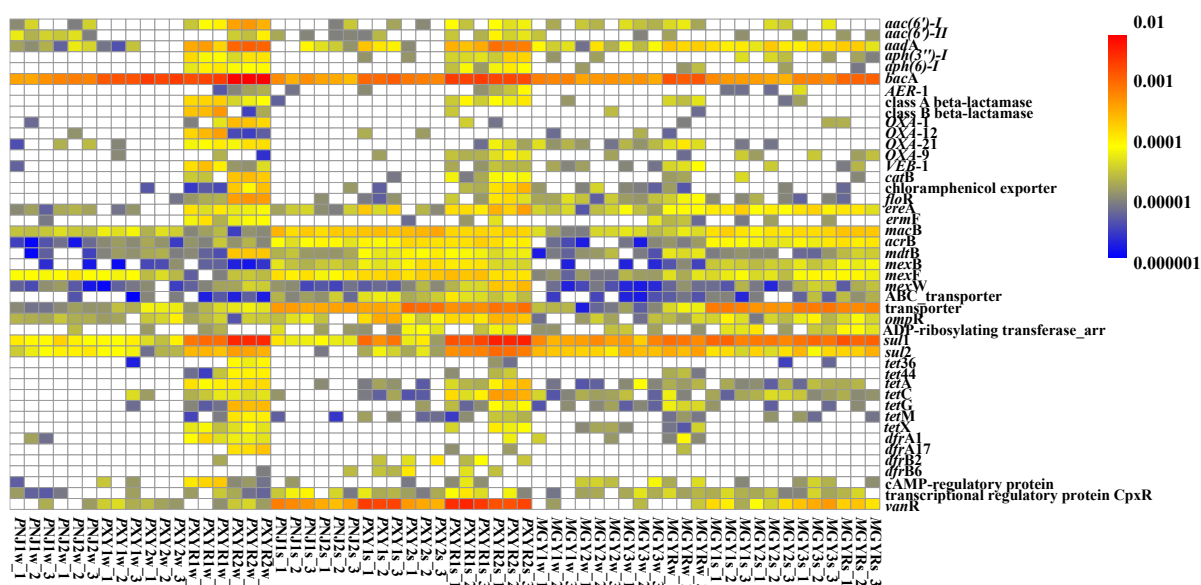

Figure S1. Relative abundance (copy of ARGs/copy of 16S rRNA genes) of ARG subtypes in all samples.

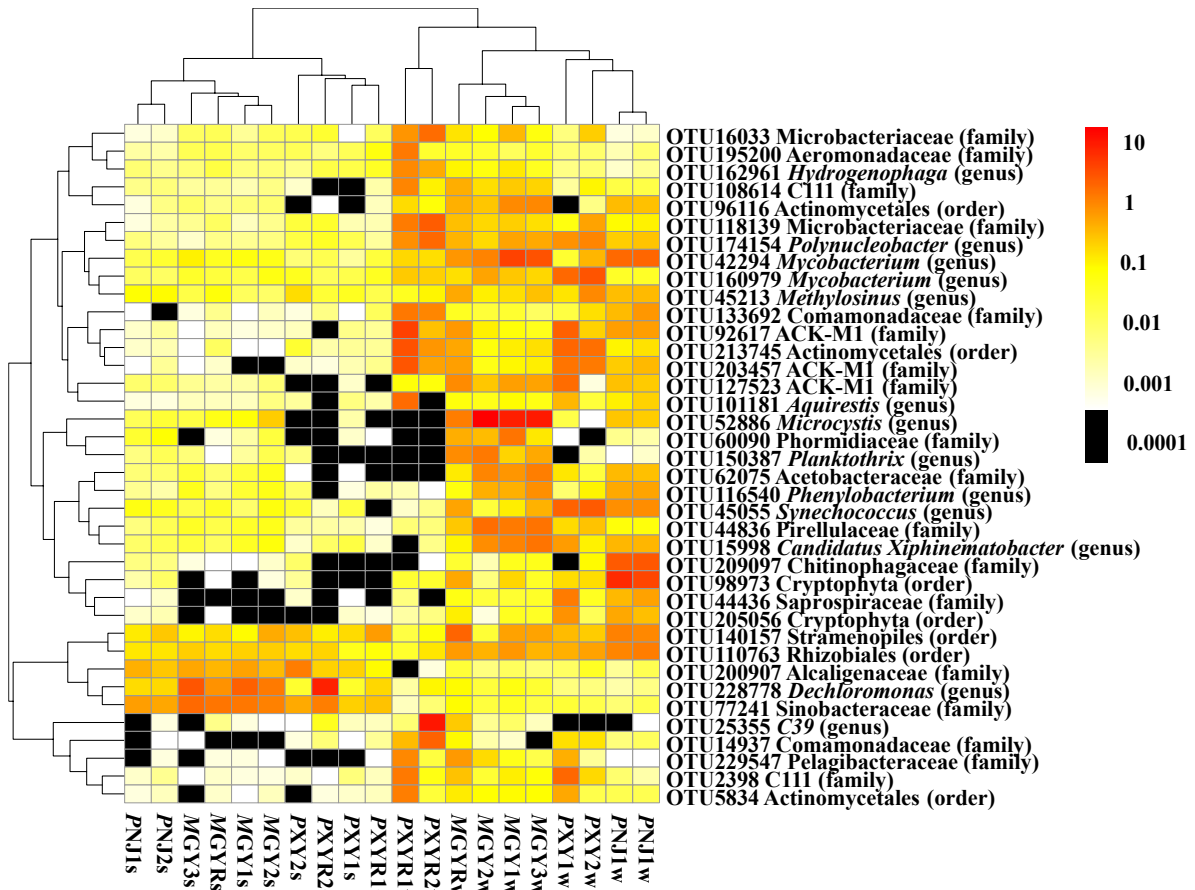

**Figure S2.** Relative abundance of the major OTUs (>3% in any sample) of all environmental samples collected in *P. clarkii* and *M. rosenbergii* aquaculture environment. The color intensity in each panel shows the percentage of each OTU in one sample.
